# Supplementary material for: Neuronal activity triggers uptake of hematopoietic extracellular vesicles in vivo
Source: PLoS Biol. 2020 Mar 16;18(3):e3000643. doi: 10.1371/journal.pbio.3000643 (PMC7075544; doi:10.1371/journal.pbio.3000643)
Supplement: S1 Table — (XLSX) [file pbio.3000643.s006.xlsx]

## Sheet: Tabelle1
Supplemental Table 1
Experiment	Sex	Age (in weeks)	Comments
LPS injection i.p.	Male	14	LPS experiments were
vaviCre-ROSA26-EYFP mice	Male	15	performed on 4 separate days
	Male	18
	Male	21
	Female	9
LPS injection i.p.	Male	11
EpoR-iCre-ROSA26 mTom/mGFP mice	Male	8
	Female	8
KA injection i.p.	Male	16	KA experiments were
vaviCre-ROSA26-EYFP mice	Male	16	performed on 4 separate days
	Male	16
	Female	15
	Female	32
DMSO infusion (controls) i.c.	Female	11	Infusion experiments were
vaviCre-ROSA26-EYFP mice	Female	13	performed on 4 separate days
	Female	20
Epoxomicin infusion i.c.	Male	21
vaviCre-ROSA26-EYFP mice	Male	11
	Male	12
	Female	11
ROSA26-EYFP mouse	Female	12	Technical control
AAV injection and light stimulation; Local field potential (LFP) recordings	Male	7	Optogenetic experiments were
ROSA26-EYFP mice	Male	7	performed on 5 separate days
	Female	10
AAV injection and light stimulation	Male	9
vaviCre-ROSA26-EYFP mice	Female	6
	Female	6
	Female	6
AAV injection, no light stimulation	Male	7
vaviCre-ROSA26-EYFP mice	Female	6
	Female	9
	Male	6
Light stimulation, no AAV injection	Female	8
vaviCre-ROSA26-EYFP mice	Male	9
	Male	9
	Male	10
	Male	9
Control enrichment, no placement	Male	8	Object placement experiments
vaviCre-ROSA26-EYFP mice	Male	8	were performed on 5 separate
	Female	8	days
	Female	8
	Female	8
Cage enrichment 1h	Male	8
vaviCre-ROSA26-EYFP mice	Male	8
	Male	8
	Female	6
	Female	6
	Female	7
	Female	10
	Female	10
	Female	10	No recombination
Peripheral EV Cre + intracranial KA stimulation	Male	12	Peripheral EV injection experiments
ROSA26-EYFP mice	Male	12	were performed on 2 separate days
	Male	12
Intracranial injection KA + wt EV	Male	8	Inctranial injection experiments
ROSA26-EYFP mice	Male	8	were performed on 2 separate
	Female	9	days
Intracranial injection KA + Cre EV	Male	10
ROSA26-EYFP mice	Female	9
	Female	9
