# Supplementary material for: Neuronal activity triggers uptake of hematopoietic extracellular vesicles in vivo
Source: PLoS Biol. 2020 Mar 16;18(3):e3000643. doi: 10.1371/journal.pbio.3000643 (PMC7075544; doi:10.1371/journal.pbio.3000643)
Supplement: S2 Table — (XLSX) [file pbio.3000643.s007.xlsx]

## Sheet: LPS Fig 1L
Hippocampus				Substantia Nigra
Mouse nº	NeuN+YFP+	Iba1+ YFP+		Mouse nº	TH+YFP+	Iba1+ YFP+
1	0.0443333	0.472333		1	0.144544	0.61
2	0.164333	0.533		2	0.138866	0.52
3	0.146333	0.524667		3	0.117466	0.53
4	0.117667	0.540333		4	0.0905521	0.51
5	0.142	0.545667		5	0.0690734	0.2
Average	0.122933	0.5232		Average	0.1121	0.474
SD	0.046986	0.0295123		SD	0.0320678	0.158209
p-Wert	0.000666	0.000666			0.000666	0.000666
controls n=10, all 0 for all areas and cell types.
								90% Konfidenzintervall
Variable	n	P	mean	sd	Min	Max	Median	Li.Grenze	Re.Grenze
NeuN+YFP	5	0.9000	12.2800	4.7002	4.4000	16.4000	14.2000	4.4000	16.4000
Iba1+YFP	5	0.9000	52.3200	2.9677	47.2000	54.6000	53.3000	47.2000	54.6000
TH+YFP+	5	0.9000	11.2200	3.2143	6.9000	14.5000	11.7000	6.9000	14.5000
Iba1+YFP	5	0.9000	47.4000	15.8209	20.0000	61.0000	52.0000	20.0000	61.0000

## Sheet: KA S3 Fig F
Hippocampus				Substantia Nigra
Mouse nº	NeuN+YFP+	Iba1+YFP+		Mouse nº	TH+YFP+	Iba1+ YFP+
1	0.028	0.229		1	0.2075	0.3
2	0.300333	0.4605		2	0.231	0.32
3	0.364667	0.5855		3	0.2595	0.39
4	0.0653333	0.24		4	0.195	0.24
5	0.168667	0.2425		5	0.2645	0.21
Average	0.1854	0.3515		Average	0.2315	0.292
SD	0.145617	0.162755		SD	0.030747	0.0704982
p-Wert	0.000666	0.000666			0.000666	0.000666
controls n=10, all 0 for all areas and cell types.
								90% Konfidenzintervall
Variable	n	P	mean	sd	Min	Max	Median	Li.Grenze	Re.Grenze
NeuN+YFP	5	0.9000	18.5400	14.5713	2.8000	36.5000	16.9000	2.8000	36.5000
Iba1+YFP	5	0.9000	35.1800	16.2935	22.9000	58.6000	24.3000	22.9000	58.6000
TH+YFP+	5	0.9000	23.1800	3.0898	19.5000	26.5000	23.1000	19.5000	26.5000
Iba1+YFP	5	0.9000	29.2000	7.0498	21.0000	39.0000	30.0000	21.0000	39.0000

## Sheet: Epoxomicin Fig 2E
Substantia Nigra
Mouse nº	% of TH+YFP+ ipsilateral	% of TH+YFP+ contralateral
1	0.06	0
2	0.0615	0
3	0.126	0
4	0.095	0
Average	0.085625	0
SD	0.0313937
p-Wert	0.057143
	3 control animals, all 0% recombination events
Variable	n	mean	sd	Min	Max	Median
% of TH+YFP+ ipsilateral	4	8.5750	3.1266	6.0000	12.6000	7.8500

## Sheet: Optogenetics Fig 3
Mouse nº	YFP+ cells in 0,01mm3
1	39.1129
2	51.4059
3	40.1292
Average	43.5493	Mean
SD	6.82296	SD
p-Wert	0.00909
controls n=9, all with 0
Variable	n	mean	sd	Min	Max	Median
YFP+ cells in 0,01mm3	3	43.5500	6.8260	39.1100	51.4100	40.1300

## Sheet: Local Field Potential Fig 3E
		local field potential (mV)
laser (mW)	intensity (mW/mm2)	mouse 1	mouse 2	mouse 3	mouse 4	average
0.5	15.9155	0.0121231	0.0519409	0.014061	0.0991516	0.0443192
1	31.831	0.0190277	0.0753784	0.00762939	0.174568	0.0691509
2	63.662	0.0369034	0.0905991	0.0280228	0.183746	0.0848179
3	95.493	0.0582352	0.0960083	0.039505	0.320381	0.128532
4	127.324	0.06511	0.10448	0.0482407	0.28448	0.125578
6	190.986	0.06168	0.09785	0.07145	0.27936	0.127585
8	254.648	0.07104	0.1111	0.07886	0.28256	0.13589
normalized data
		local field potential (%)
laser (mW)	intensity (mW/mm2)	mouse 1	mouse 2	mouse 3	mouse 4	average
0.5	15.9155	20.8175	54.1004	35.5929	30.948	35.3647
1	31.831	32.6739	78.5124	19.3125	54.4877	46.2466
2	63.662	63.3696	94.3659	70.9347	57.3524	71.5057
3	95.493	100	100	100	100	100
4	127.324	111.805	108.824	122.113	88.7942	107.884
6	190.986	105.915	101.918	180.863	87.1961	118.973
8	254.648	121.988	115.719	199.62	88.1949	131.381

## Sheet: Optogenetics (lineages) Fig 3
Mouse nº	% of Iba1+YFP+ of all YFP+ cells
1	0.0697674		average of 80 cells counted per brain
2	0.0434783
3	0
Average	0.0377486
SD	0.0352349

## Sheet: Object Placement Fig 4
Mouse nº	YFP+ cells DG in 0,01mm3	YFP+ cells CA in 0,01mm3
1	127.079	36.091
2	107.596	53.7813
3	119.024	45.2999
4*	0	0
Average	117.9	45.0574
SD	14.1067	13.8284
p-Wert	0.035714	0.035714
	controls n=5, all 0
Variable	n	mean	sd	Min	Max	Median
YFP+ cells DG in 0,01mm3	4	88.4250	59.4893	0	127.0800	113.3100
YFP+ cells CA in 0,01mm3	4	33.7925	23.6582	0	53.7800	40.6950
* "Of the nine animals used in the ‘object placement’ experiment, one animal did not show marker gene-positive cells (also see Supplemental Table S1). We quantified three of the eight positive animals to give an approximation of the frequency of marker gene-positive cells under those conditions and only these animals were therefore used for the statistical analysis."

## Sheet: Object placement (lin.) Fig 4
Mouse nº	Total YFP+ cells	Iba1+ YFP+ cells	% of Iba1+YFP+
1	90	14	0.155556
2	131	16	0.122137
3	126	16	0.126984
Average	115.667	15.3333	0.134892
SD	22.3681	1.1547	0.0180582
